# Supplementary material for: OsDGD2β is the Sole Digalactosyldiacylglycerol Synthase Gene Highly Expressed in Anther, and its Mutation Confers Male Sterility in Rice
Source: PubMed Central journal article supplement (PMC6694320; doi:10.1186/s12284-019-0320-z), 2019-08-14

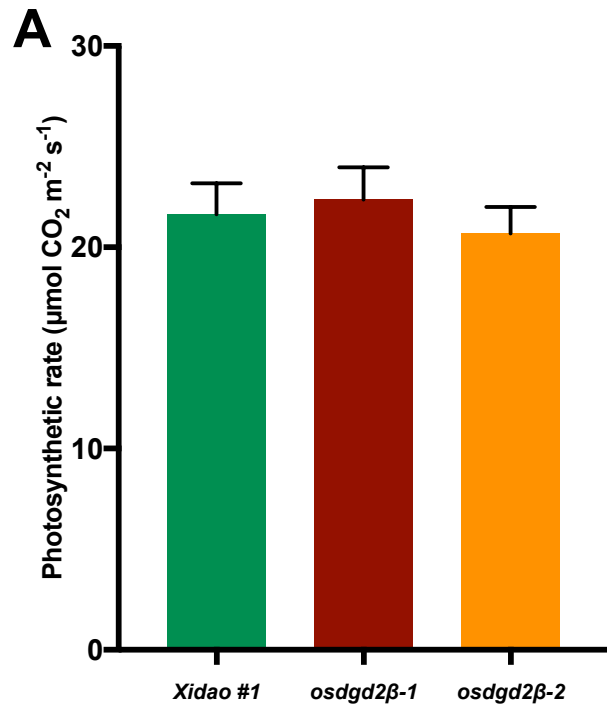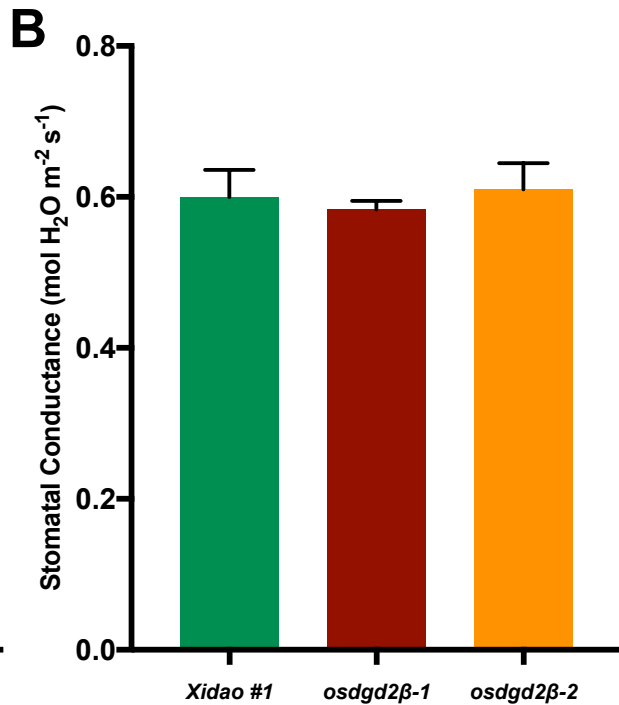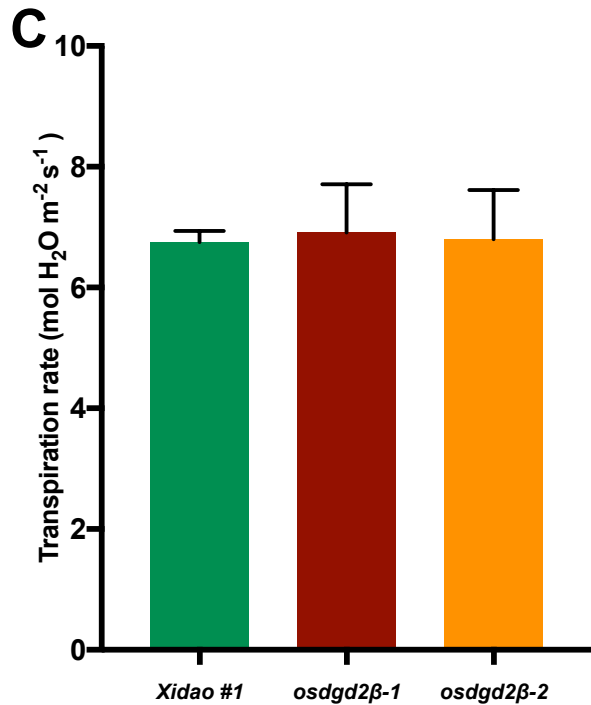

Supplement: 12284_2019_320_MOESM5_ESM.pdf [file 12284_2019_320_MOESM5_ESM.pdf]
